1 The neural representation of personally familiar and  
2 unfamiliar faces in the distributed system for face  
3 perception

4 Matteo Visconti di Oleggio Castello<sup>1,+\*</sup>, Yaroslav O. Halchenko<sup>1,+\*</sup>,

5 J. Swaroop Guntupalli<sup>1</sup>, Jason D. Gors<sup>1</sup>, M. Ida Gobbini<sup>1,2,\*</sup>

6

7 1: Department of Psychological and Brain Sciences, Dartmouth College, Hanover, NH  
8 03755, USA

9 2: Dipartimento di Medicina Specialistica, Diagnostica e Sperimentale (DIMES),  
10 Medical School, University of Bologna, Bologna, Italy

11

12 +: these authors contributed equally to the work

13 \*: corresponding authors

14 M. Ida Gobbini: [mariaida.gobbini@unibo.it](mailto:mariaida.gobbini@unibo.it)

15 Matteo Visconti di Oleggio Castello: [mvdoc.gr@dartmouth.edu](mailto:mvdoc.gr@dartmouth.edu)

16 Yaroslav O. Halchenko: [yoh@dartmouth.edu](mailto:yoh@dartmouth.edu)

## 17 **Abstract**

18 Personally familiar faces are processed more robustly and efficiently than unfamiliar  
19 faces. The human face processing system comprises a core system that analyzes the  
20 visual appearance of faces and an extended system for the retrieval of person-  
21 knowledge and other nonvisual information. We applied multivariate pattern analysis  
22 to fMRI data to investigate aspects of familiarity that are shared by all familiar  
23 identities and information that distinguishes specific face identities from each other.  
24 Both identity-independent familiarity information and face identity could be decoded  
25 in an overlapping set of areas in the core and extended systems. Representational  
26 similarity analysis revealed a clear distinction between the two systems and a  
27 subdivision of the core system into ventral, dorsal and anterior components. This  
28 study provides evidence that activity in the extended system carries information about  
29 both individual identities and personal familiarity, while clarifying and extending the  
30 organization of the core system for face perception.

31

32 **Keywords:** personally familiar faces; mvpa; decoding; brain networks; core and  
33 extended systems; representational similarity analysis.

## 34 Introduction

35 A wide and distributed network of brain areas underlies face processing. The model  
36 by Haxby and colleagues (Gobbini & Haxby, 2007; Haxby & Gobbini, 2011; Haxby,  
37 Hoffman, & Gobbini, 2000) posited a division between a core system involved in the  
38 processing the visual appearance of faces—comprising the Occipital Face Area (OFA),  
39 the Fusiform Face Area (FFA), and the posterior Superior Temporal Sulcus (pSTS)—  
40 and an extended system, comprising parietal, frontal, and subcortical areas, involved  
41 in inferring socially relevant information from faces, such as direction of attention,  
42 intentions, emotions, and retrieval of person knowledge (Gobbini, 2010; Gobbini &  
43 Haxby, 2007; Haxby & Gobbini, 2011; Haxby et al., 2000).

44 The definition of the core system has been extended to include areas in the anterior  
45 fusiform gyrus (the anterior temporal face area, ATFA; Collins & Olson, 2014; Rajimehr,  
46 Young, & Tootell, 2009), the anterior superior temporal sulcus (aSTS-FA; Carlin,  
47 Calder, Kriegeskorte, Nili, & Rowe, 2011; Duchaine & Yovel, 2015; Pitcher, Dilks, Saxe,  
48 Triantafyllou, & Kanwisher, 2011), and the inferior frontal gyrus (IFG-FA; Duchaine &  
49 Yovel, 2015; Guntupalli, Wheeler, & Gobbini, 2017; J. V. Haxby et al., 1994). For  
50 example, in a recent fMRI neural decoding study with visually familiar faces (Guntupalli  
51 et al., 2017), we showed that the representation of face identity is progressively  
52 disentangled from image-specific features along the ventral visual pathway. While  
53 early visual cortex and the OFA represented head view independently of the identity of  
54 the face, we recorded an intermediate level of representation in the FFA in which  
55 identity was emerging but was still entangled with head view. The human face  
56 processing pathway culminated in the right ATFA and IFG-FA where we recorded a  
57 view-invariant representation of face identity.

58 While both unfamiliar and familiar faces effectively activate the core system (Duchaine  
59 & Yovel, 2015; & Haxby, 2006; Guntupalli et al., 2017; Natu & O’Toole, 2011; Pitcher  
60 et al., 2011), familiar faces activate the extended system more strongly than unfamiliar  
61 faces (Bobes, Lage Castellanos, Quiñones, García, & Valdes-Sosa, 2013; Cloutier,  
62 Kelley, & Heatherton, 2011; Gobbini & Haxby, 2007; Natu & O’Toole, 2011; Taylor et  
63 al., 2009). Personally familiar faces recruit Theory of Mind (ToM) areas such as the

64 medial prefrontal cortex (MPFC) and the temporo-parietal junction (TPJ), because they  
65 are more strongly associated with person knowledge (Cloutier et al., 2011; Gobbini &  
66 Haxby, 2007; Gobbini, Leibenluft, Santiago, & Haxby, 2004); they activate the  
67 precuneus and the anterior temporal cortices, suggesting retrieval of long-term  
68 episodic memories; they modulate the activity in the amygdala and insula, suggesting  
69 an increased emotion processing (Gobbini & Haxby, 2007; Gobbini et al., 2004; Natu  
70 & O'Toole, 2011). Because the core and extended systems have been mostly studied  
71 separately, we lack a clear understanding of how personal familiarity, consolidated  
72 through repeated interactions, affects the representations in the core system, and how  
73 core and extended systems interact to create the known behavioral advantages for  
74 personally familiar faces.

75 The behavioral literature on face processing (Bruce, Henderson, Newman, & Burton,  
76 2001; A. M. Burton, Wilson, Cowan, & Bruce, 1999; Gobbini et al., 2013; Ramon,  
77 Vizioli, Liu-Shuang, & Rossion, 2015; Visconti di Oleggio Castello, di Oleggio Castello,  
78 Wheeler, Cipolli, & Gobbini, 2016; Visconti di Oleggio Castello, Guntupalli, Yang, &  
79 Gobbini, 2014; Visconti di Oleggio Castello & Gobbini, 2015) suggests that, despite  
80 the subjective impression of efficient or “expert” perception of natural faces (Diamond  
81 & Carey, 1986), only familiar faces are detected and recognized more robustly and  
82 efficiently, in stark contrast with the surprisingly inefficient identification of unfamiliar  
83 faces. Recognition of personally familiar faces is highly accurate even when images  
84 are severely degraded, while recognition of unfamiliar faces is markedly impaired by  
85 variation in head position or lighting, even with good image quality (Bruce et al., 2001;  
86 A. Mike Burton, Jenkins, & Schweinberger, 2011; A. M. Burton et al., 1999; Hancock,  
87 Bruce, & Burton, 2000; Jenkins & Burton, 2011). Detection of personally familiar faces  
88 is facilitated even in conditions of reduced attentional resources and without  
89 awareness (Gobbini et al., 2013).

90 The representations of familiar and unfamiliar faces may differ in multiple ways.  
91 Familiar identities could have more robust, individually-specific representations, which  
92 are learned and consolidated over the course of personal interactions. Alternatively,  
93 familiar face representations could be enhanced with attributes that are similar across  
94 many personally familiar faces. For example, personally familiar faces (especially those

95 used in the present and our previous experiments that are faces of close relatives of  
96 personal friends) are associated with person-knowledge and emotional attachment  
97 that lead to social interactions that are different from the interactions with strangers,  
98 and these attributes may be shared across many familiar—one may be more open  
99 and unguarded with family and personal friends (Gobbini et al., 2004).

100 Here we applied multivariate pattern analyses (MVPA; Haxby et al., 2001; Haxby,  
101 Connolly, & Guntupalli, 2014), including MVP classification (MVPC) and  
102 representational similarity analysis (RSA; Kriegeskorte & Kievit, 2013) with two goals in  
103 mind. First, we wanted to dissociate familiarity information from identity information in  
104 the core and extended systems. Second, we wanted to investigate the relationships  
105 among core and extended face processing areas by examining the similarities of their  
106 representational spaces using second-order representational geometry (Guntupalli et  
107 al., 2016; Kriegeskorte & Kievit, 2013; Kriegeskorte, Mur, & Bandettini, 2008).

108 We first derived independent neural measures of identification and familiarity. To  
109 prevent any effect of familiarity information in identity decoding, we performed identity  
110 classification separately for familiar and unfamiliar faces. To control for the effect of  
111 identity-specific visual information in familiarity decoding, we trained classifiers to  
112 distinguish familiar from unfamiliar faces, and tested them on left-out identities. The  
113 results replicated the distinction between the representations of personally familiar  
114 and unfamiliar faces in the extended system that was previously revealed only with  
115 univariate analysis (Gobbini & Haxby, 2007), showing that this effect captured factors  
116 that were common across familiar faces and invariant across identities.

117 To unravel the representational structure of the face processing network, we  
118 investigated the relationships among the areas of the core and extended system  
119 uncovered by the classification analyses. Using the approach used by Guntupalli et al.  
120 (2016) (see also Kriegeskorte et al., 2008), we studied the similarities between  
121 representational geometries (Kriegeskorte & Kievit, 2013) in different face-processing  
122 areas (second-order representational geometry). This analysis revealed clear  
123 distinctions between the core system and the extended system, supporting the model  
124 by Gobbini & Haxby (2007), Haxby & Gobbini (2011), Haxby et al. (2000). In addition,

125 the results support the extension of the core system to more anterior areas, such as  
126 the ATFA, the aSTS-FA and IFG-FA (Collins & Olson, 2014; Duchaine & Yovel, 2015;  
127 Fairhall & Ishai, 2007; Guntupalli et al., 2017; Rajimehr et al., 2009), and reveal a finer  
128 subdivision of this system into ventral, dorsal, and anterior components.

## 129 **Results**

130 In this experiment, we investigated the face processing network while participants  
131 performed an oddball-detection task with faces of friends and strangers (see Figure 1).  
132 We first investigated which areas responded more strongly to familiar faces than  
133 unfamiliar ones with a standard GLM analysis. Because familiarity information  
134 (whether a face is a familiar one) is necessarily confounded with identity information  
135 (who that person is), we next used MVPC to dissociate which areas of the core and  
136 extended system encode identity-independent familiarity information (familiar vs.  
137 unfamiliar classification across identities), and which parts of the network encode  
138 identity information. We performed two classification analyses using different cross-  
139 validation schemes to control for the effect of identity on the representation of general  
140 familiarity and to control for the effect of familiarity on the representation of identity.  
141 For the familiarity classification, we employed a leave-two-identities-out cross-  
142 validation scheme, where the classifier was trained on six faces (three familiar, three  
143 unfamiliar) to distinguish between familiar and unfamiliar faces, and tested on two left-  
144 out identities. This cross-validation scheme reduced the effect of identity information  
145 (see Supplementary Figures 1 and 2). For the identity classification, we decoded the  
146 four familiar faces and the four unfamiliar faces separately to eliminate the effect of  
147 familiarity information in the classification of identity information. Finally, we  
148 investigated the network structure derived from the similarities of representations to  
149 investigate relationships among areas in the core and extended system.

150

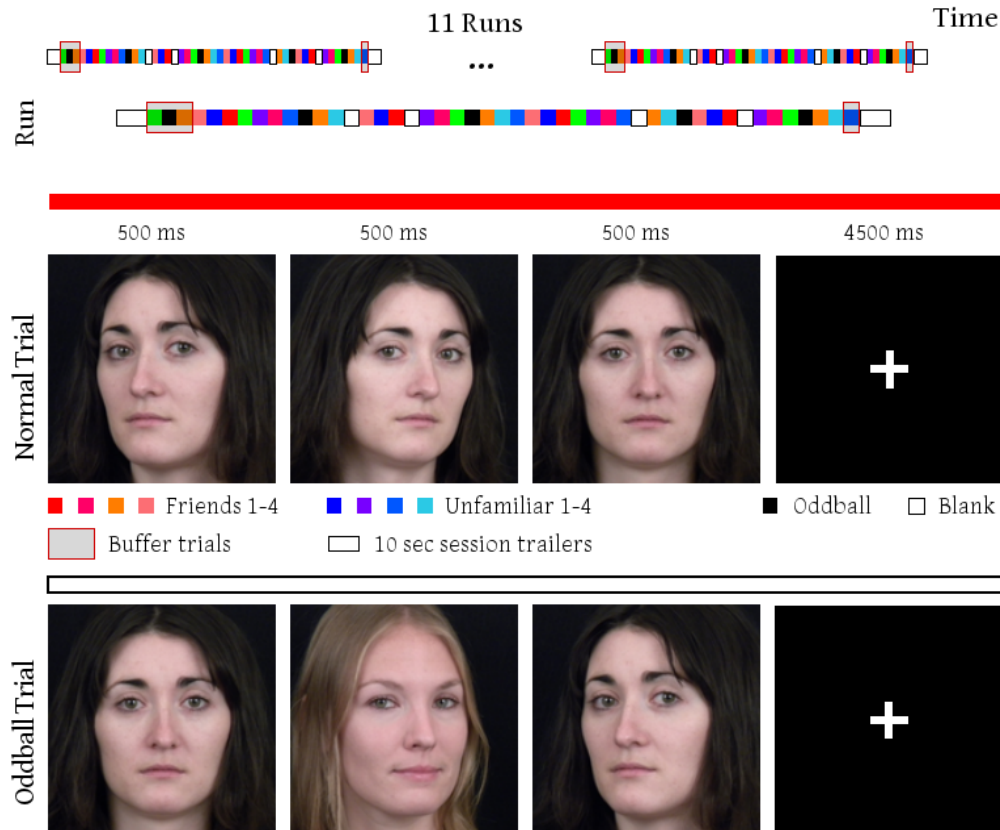

**Figure 1: Slow event-related fMRI design.** During each trial, images were presented in sequences of three pictures of the same identity (normal trial) or two different identities (oddball trials) in front-view or 30-degree profile views. Subjects engaged in an oddball-detection task to ensure that they paid attention to each stimulus.

## 151 GLM

152 In the univariate analysis contrasting Familiar > Unfamiliar we found significant  
153 activation in bilateral MTG/STS extending along the full length of the right STS.  
154 Additionally, we found significant clusters in the bilateral precuneus and bilateral  
155 MPFC, as well as in the right IFG. Familiar faces also evoked stronger responses in  
156 the left mid fusiform gyrus and the right anterior fusiform gyrus near the locations of  
157 the FFA (Grill-Spector & Weiner, 2014; Weiner et al., 2013) and ATFA (Collins & Olson,  
158 2014). For the contrast Unfamiliar > Familiar we found only one significant cluster in

159 the right inferior parietal lobule encroaching on the TPJ. Figure 2 shows the resulting  
160 statistical maps projected on the surface.  
161

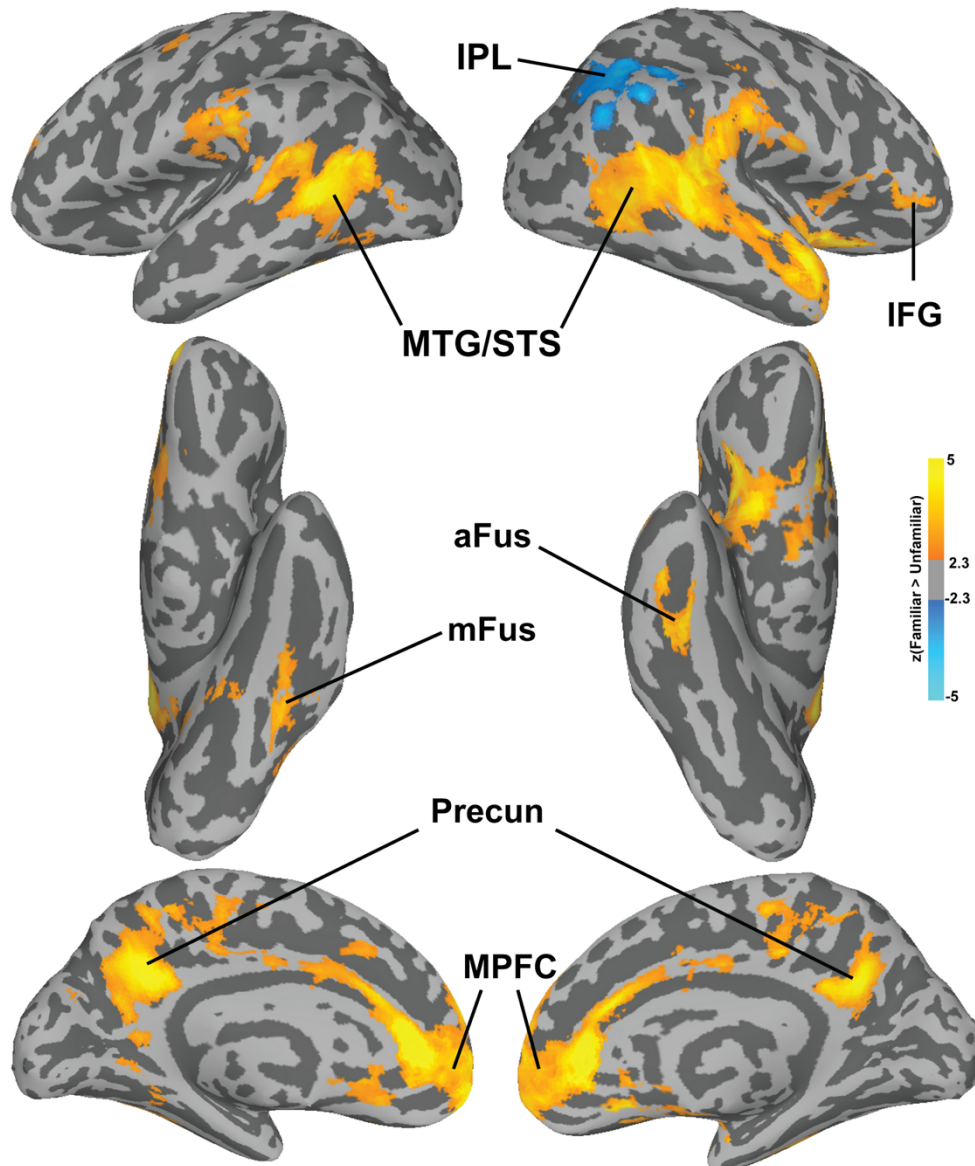

**Figure 2. Cluster-corrected ( $p < .05$ ) z-values for the univariate contrast Familiar > Unfamiliar.** Abbreviations: IPL: inferior parietal lobule; mFus: middle fusiform gyrus; aFus: anterior fusiform gyrus; TPJ: temporo-parietal junction; MTG/STS: middle temporal gyrus/superior temporal sulcus; Precun: precuneus; MPFC: medial prefrontal cortex; IFG: inferior frontal gyrus.



## 162 **MVPA**

### 163 **Familiarity Classification**

164 The results of searchlight MVPC of identity-independent familiarity largely overlapped  
165 with the univariate maps, showing significant classification in the bilateral MTG/STS,  
166 mid and anterior right fusiform gyrus, right IFG, TPJ, precuneus, and MPFC (Figure 3).  
167 Surprisingly, small patches of cortex in early visual cortex also showed significant  
168 MVPC of identity-independent familiarity. We further investigated MVPC in early visual  
169 cortex with additional analyses on probabilistic ROI masks from Wang, Mruczek,  
170 Arcaro, & Kastner (2015), and found statistically significant decoding performance in  
171 V2 and V3 (see Supplementary Methods and Supplementary Figure 7). Since testing  
172 was performed on left-out familiar and unfamiliar identities, and all pictures were taken  
173 with the same equipment and settings, it is unlikely that this result was due simply to  
174 low-level features that distinguished familiar from unfamiliar faces. To test this further,  
175 we extracted features from the layers C1 and C2 of the HMAX model (Riesenhuber &  
176 Poggio, 1999; Serre, Wolf, Bileschi, Riesenhuber, & Poggio, 2007) and performed the  
177 same classification analysis, and found that decoding performance was not  
178 statistically significant (accuracy with C1 features 52%,  $p = 0.66$ ; accuracy with C2  
179 features 49%,  $p = 0.95$ ; see Supplementary Methods and Supplementary Figure 8).

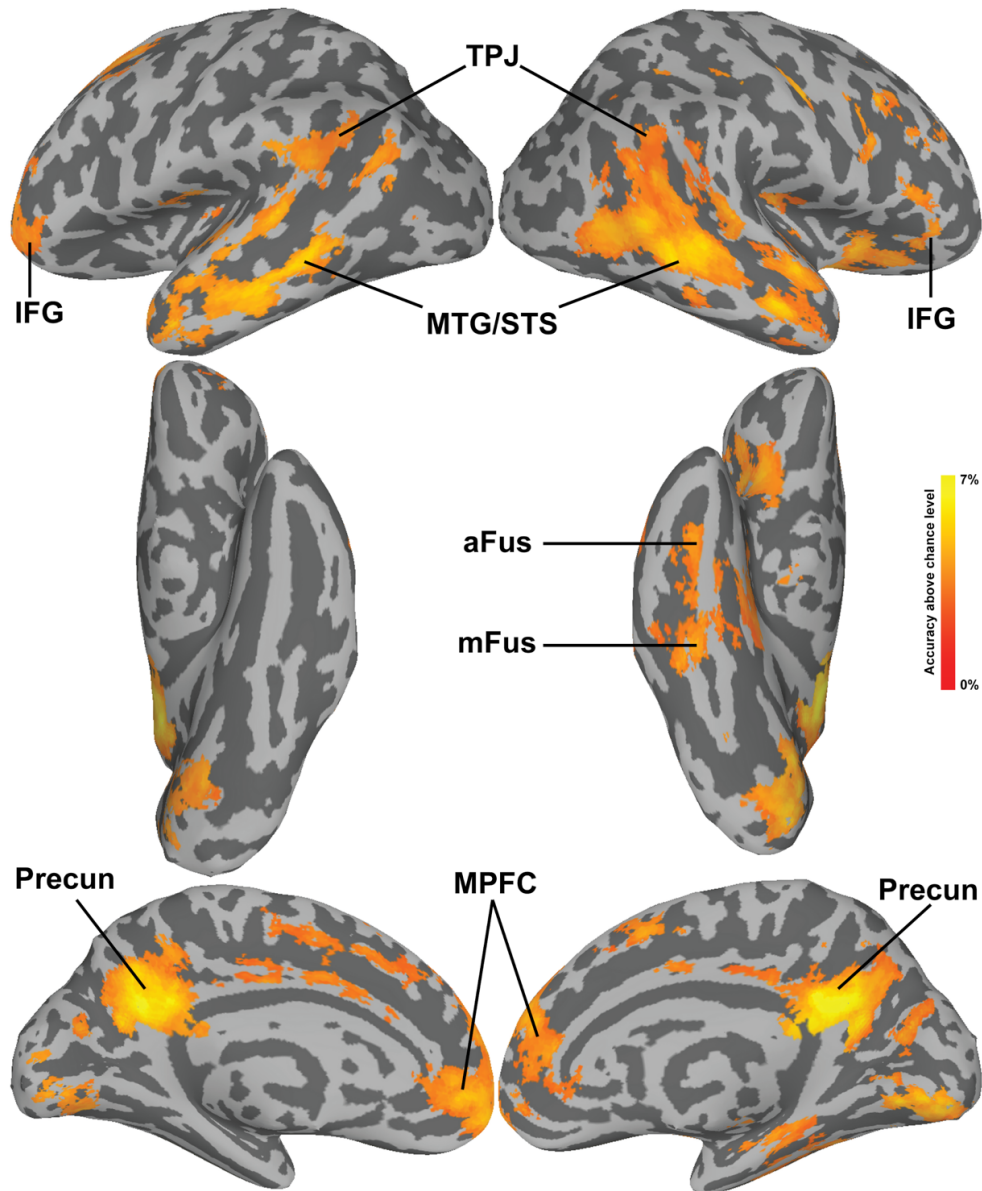

**Figure 3. Searchlight maps for the Familiarity classification projected onto the surface.** Maps were thresholded at a z-TFCE score of 1.65, corresponding to  $p < 0.05$  one-tailed (corrected for multiple comparisons). Abbreviations: mFus: middle fusiform gyrus; aFus: anterior fusiform gyrus; TPJ: temporo-parietal junction; MTG/STS: middle temporal gyrus/superior temporal sulcus; Precun: precuneus; MPFC: medial prefrontal cortex; IFG: inferior frontal gyrus.

## 181 **Identity Classification**

182 The identity classification analysis showed that identity could be decoded in many of  
183 the same areas as identity-independent familiarity (Figure 4). Significant classification  
184 was found in the MPFC and precuneus, and in the bilateral MTG/STS, TPJ, and IFG.  
185 The area in the precuneus with significant identity classification, however, was quite  
186 dorsal, whereas that for significant familiarity classification was ventral and included  
187 the posterior cingulate. Identity classification was significant in bilateral visual cortex  
188 starting in EV and extending to occipital, posterior, and mid fusiform cortices.  
189 Although MVPC of familiar identities showed a weak trend towards higher accuracies  
190 than for unfamiliar identities in the IFG and MTG/STS (Supplementary Figures 4, 5,  
191 and 6), these differences were not significant despite the large number of subjects.

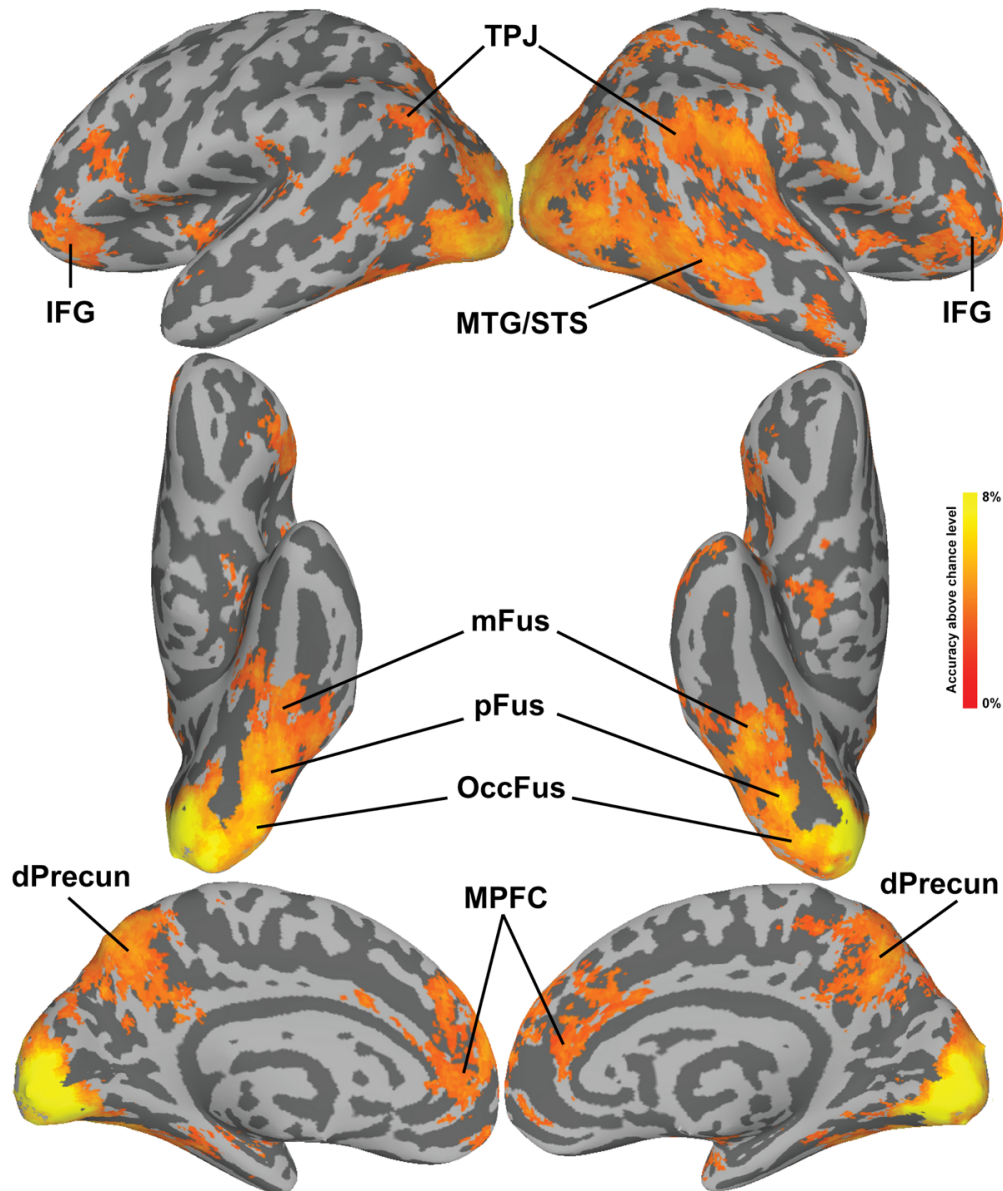

**Figure 4. Searchlight maps for the Identity classification.** The classification was run separately for familiar and unfamiliar identities (4-way), and the resulting maps were averaged. Maps were thresholded at a z-TFCE score of 1.65, corresponding to  $p < 0.05$  one-tailed (corrected for multiple comparisons). Abbreviations: OccFus: occipital fusiform gyrus; pFus: posterior fusiform gyrus; mFus: middle fusiform gyrus; TPJ: temporo-parietal Junction; MTG/STS: middle temporal gyrus/superior temporal sulcus; dPrecun: dorsal precuneus; MPFC: medial prefrontal cortex; IFG: inferior frontal gyrus.

## 192 **ROI Analysis and Second-order Representational Geometry**

193 We investigated the relationships among the areas uncovered by the classification  
194 analysis as a second-order, inter-areal representational geometry. We selected 30  
195 spherical ROIs (see Methods for how they were selected, Figure 5 for their location,  
196 and Supplementary Table 1 for their MNI coordinates) and computed a cross-  
197 validated representational dissimilarity matrix (Henriksson et al., 2015) in each ROI.  
198 We then constructed a distance matrix quantifying the similarity of these RDMs  
199 between all pairs of ROIs. Then, we computed an MDS solution to visualize the  
200 geometry of this inter-ROI matrix. Figure 6 shows the results of a 2D MDS.  
201 Supplementary Figure 10 shows the distance matrix, and Supplementary Figures 11  
202 and 12 show the full MDS solution.

203 The 2D solution captured relationships among areas in the ventral portion of the core  
204 system in the first dimension, and relationships among areas in the dorsal and anterior  
205 parts of the core system and areas in the extended system in the second dimension.  
206 The first dimension showed a progression from EV areas to the posterior, mid, and  
207 anterior fusiform areas. Extended system areas were all at the distant end of the first  
208 dimension, as were the areas in the dorsal part of the core system (MTG/STS) and the  
209 IFG. The second dimension captured distinctions among these extended and core  
210 system areas, with the precuneus areas clustered together at one end, the MPFC and  
211 TPJ in the middle, and the dorsal and anterior core system areas at the other end.

212 We replicated this second-order RSA on an independent fMRI dataset collected while  
213 different subjects watched a full-length audiovisual movie, *Raiders of the Lost Ark*  
214 (Haxby et al. 2011; Guntupalli et al. 2016). This naturalistic stimulus contained a rich  
215 variety of dynamic faces that rapidly became familiar while the plot unfolded. The  
216 inter-ROI similarity matrix and MDS plot replicated the results based on  
217 representational geometry for the eight faces in the experiment (Figure 6). The results  
218 tend to be more clearly defined for the movie data, probably due to the dynamic  
219 videos, the larger data set, and hyperalignment of the data. Contributions from scene  
220 context, language, music, and narrative structure might also play a role (Huth, de  
221 Heer, Griffiths, Theunissen, & Gallant, 2016; Simony et al., 2016). The 2D solution

222 cleanly captured distinctions in the ventral core system in the first dimension and in  
223 the extended, dorsal core, and anterior core systems in the second dimension, with  
224 remarkably similar placement of ROIs on each of these dimensions between task data  
225 and movie data.

226 We quantified the similarity of the within-system RDMs by running a linear mixed-  
227 effect model on the correlation values and contrasting within-systems correlations  
228 with between-systems correlations. We found a clear distinction between the core and  
229 extended systems in terms of similarity of representational geometries. For the task  
230 data, the correlations within the extended system were significantly higher than the  
231 between-system correlations (estimate of the contrast “Within Extended > Between”  
232 0.0993 [0.0875, 0.1111] 95% confidence interval, t-value = 16.36), while the  
233 correlations within the core system were not significantly different from the between-  
234 system correlations (estimate of the contrast “Within Core > Between” 0.0044  
235 [-0.0043, 0.0130], t-value = 1.00). For the movie data, both contrasts were significant:  
236 within-core vs. between 0.0678 [0.0619, 0.0738], t-value = 22.47; and within-extended  
237 vs. between 0.1479 [0.1398, 0.1565], t-value = 35.07. Supplementary Tables 2 and 3  
238 show the full parameter estimates for both models, while Supplementary Tables 4 and  
239 5 report additional statistics on the subsystems.

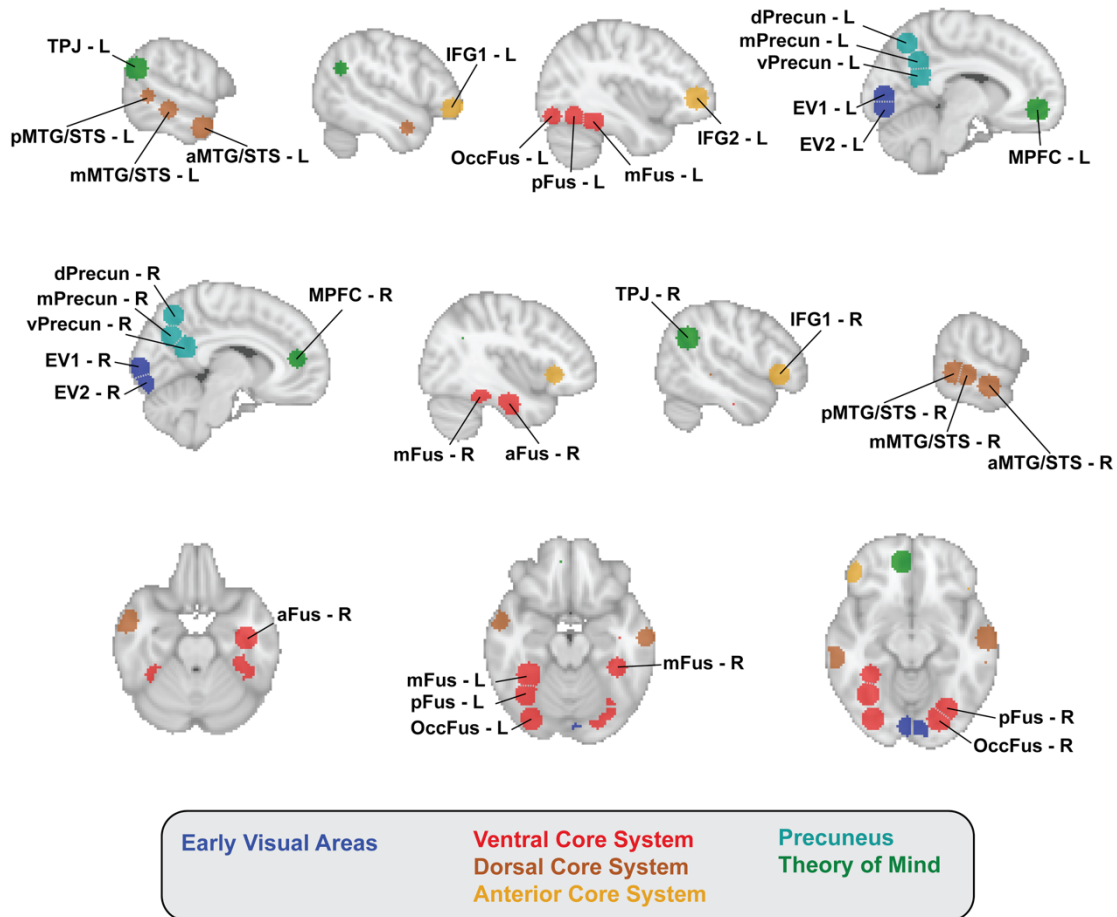

**Figure 5. Spherical ROIs used to analyze the similarity of representational geometries.**

Top row shows left sagittal slices; middle row shows right sagittal slices; bottom row shows axial slices. Regions are color coded according to the system they belong to. Grey dotted lines between ROIs indicates that they were contiguous but not overlapping (see Methods for details).

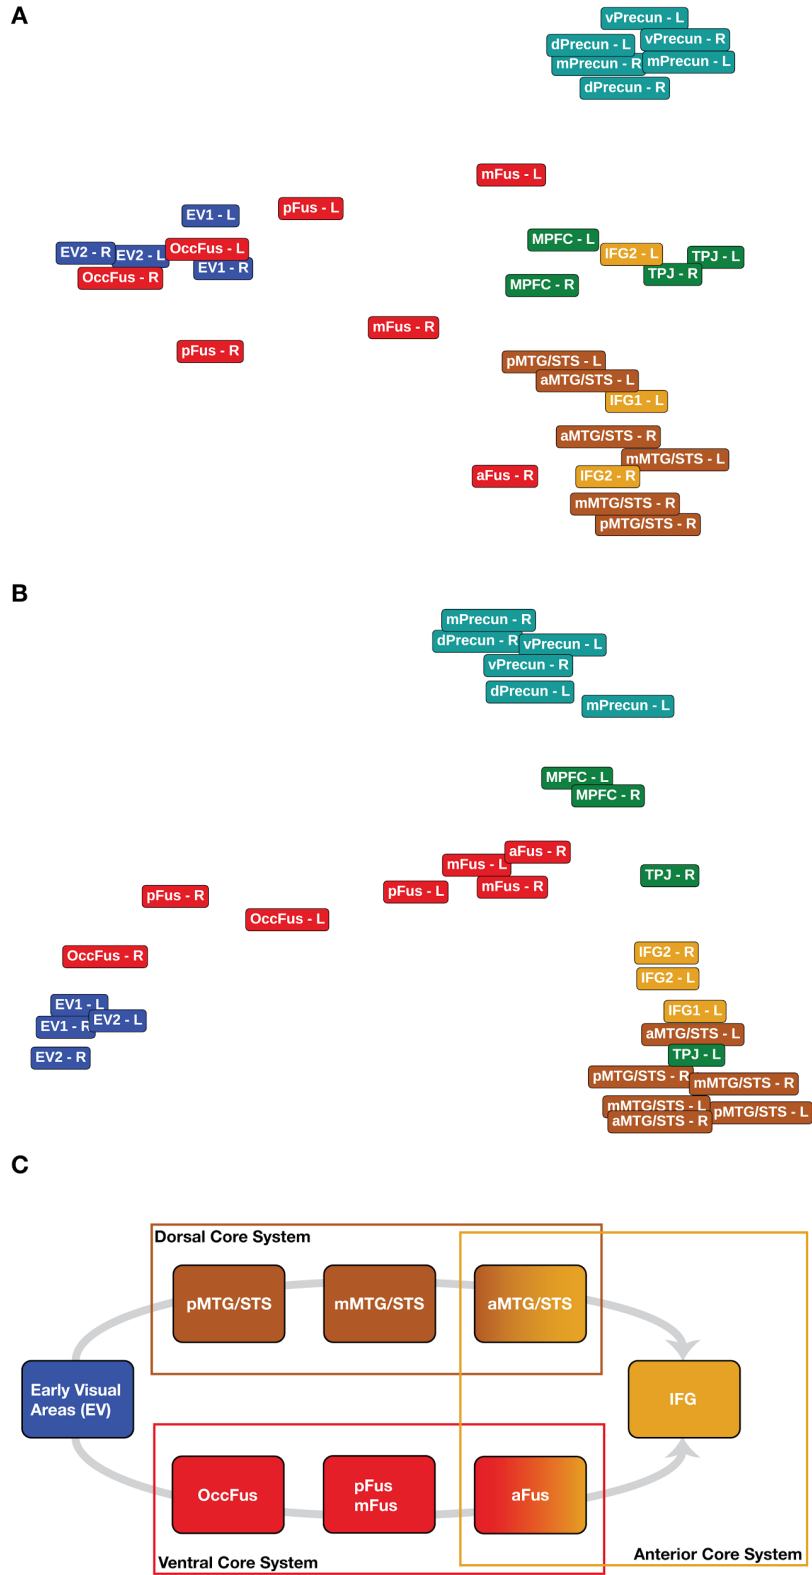



**Figure 6. Similarity of neural representations in ROIs derived from familiarity and identity decoding.** Top panel and middle panel show MDS solutions based on the task data (A) and the hyperaligned movie data (B) (Guntupalli et al., 2016; Haxby et al., 2011) (see Methods section for more details). The color of the labels indicates the system to which the ROI belongs to (see Figure 5 for their location and Supplementary Table 1 for the MNI coordinates). With both datasets the MDS solution shows the hierarchy from early visual cortex to ventral core system (first dimension, x-axis), as well as a segregation between the precuneus, theory of mind areas, and areas of the anterior and dorsal core system (second dimension, y-axis). Panel (C) shows the proposed division of the core system into dorsal, ventral, and anterior portions. Representation of identity and gaze in the anterior core areas are disentangled from variations in head view (Carlin, Rowe, Kriegeskorte, Thompson, & Calder, 2012; Guntupalli et al., 2017).

241

## 242 **Discussion**

243 In this experiment we investigated how familiar and unfamiliar faces are represented in  
244 the distributed neural system for face perception. We distinguished between familiarity  
245 information, abstracted from the visual appearance of the faces, and the identification  
246 of individual faces, controlling for the added information of personal familiarity. These  
247 analyses revealed an extensive network of areas that carry information about face  
248 familiarity and identity, replicating previous studies that used univariate analyses, but  
249 providing more details about the type of information present in those areas. We then  
250 analyzed the second-order representational geometry of this extensive network,  
251 revealing a clear distinction between the core and the extended systems for face  
252 perception and a new subdivision of the areas in the core system.

253 The results suggest that the core system for face perception can be separated into  
254 ventral, dorsal, and anterior subsystems. The ventral core system consists of fusiform  
255 areas extending from the occipital lobe to the anterior ventral temporal lobe. The  
256 dorsal system extends from the posterior MTG/STS to anterior lateral temporal  
257 cortex. The representations in the dorsal core system did not appear to have strong  
258 similarities with those in the ventral core system, consistent with the functional  
259 distinction between dorsal and ventral areas suggested by O'Toole, Roark, & Abdi  
260 (2002) and Pitcher et al. (2011). The anterior areas in the fusiform gyrus, the anterior  
261 MTG/STS, and the IFG may be the convergence of the ventral and dorsal pathways in  
262 which representations of faces become invariant to facial attributes such as head  
263 position (Carlin et al., 2011; Guntupalli et al., 2017) and perhaps other social  
264 attributes. For example, the right anterior STS plays a role in the representation of the  
265 dangerousness of animals (Connolly et al., 2016) and may play a role in the  
266 representation of social impressions, such as trustworthiness and aggressiveness  
267 (Todorov, Gobbini, Evans, & Haxby, 2007).

268 We teased apart neural responses due to factors that are shared by familiar faces  
269 from factors that are specific to familiar and unfamiliar identities. To separate identity-  
270 independent familiarity information from identity-specific visual information, we  
271 employed a cross-validation scheme in MVPC of face familiarity in which we tested

272 the classifier on identities that were not included in the training data. To investigate  
273 identity-specific information that was independent of familiarity, we tested MVPC of  
274 familiar and unfamiliar identities separately.

275 We found reliable decoding of identity-independent familiarity in extended system  
276 areas that showed stronger responses to familiar faces in univariate analyses, such as  
277 theory of mind areas (precuneus, TPJ, and MPFC), consistent with previous reports  
278 (Gobbini & Haxby, 2007; Natu & O'Toole, 2011). Importantly, MVPC of familiarity was  
279 designed to test for a familiarity effect that was not specific to familiar individuals,  
280 revealing that this network does carry such identity-independent information about the  
281 familiarity of faces. Both the univariate and MVPC results expand the areas reported  
282 previously to include additional areas that are components of the dorsal and anterior  
283 core system for face perception in the MTG/STS, anterior fusiform cortex, and IFG.  
284 We suspect that our relatively large sample size made it possible to identify this more  
285 extensive network.

286 In this experiment subjects had to perform an oddball-detection task to ensure that  
287 they paid attention to the stimuli. It is possible that some of the decoding results for  
288 familiarity might be attributed to differences in attentional demands between  
289 personally familiar and unfamiliar faces, but it is hard to predict the direction of an  
290 effect of attention. Behavioral evidence suggests that personally familiar faces are  
291 processed faster (Ramon, Caharel, & Rossion, 2011; Ramon et al., 2015; Visconti di  
292 Oleggio Castello et al., 2016, 2014; Visconti di Oleggio Castello & Gobbini, 2015), and  
293 require fewer attentional resources (Gobbini et al., 2013). On the other hand, we also  
294 have shown that familiar faces, relative to unfamiliar faces, slow down shifts of  
295 attention away from the face, suggesting they hold attention (Chauhan, Visconti di  
296 Oleggio Castello, Soltani, & Gobbini, 2017). We found reduced BOLD activation to  
297 personally familiar faces only in the IPL (Corbetta & Shulman, 2002; Singh-Curry &  
298 Husain, 2009), while areas of the core and extended systems showed stronger  
299 responses. If the stronger response to familiar faces in core and extended system  
300 areas were due to spontaneous attention, one would also expect a stronger response  
301 in the IPL and other attention-related cortical areas, which we did not find.

302 Unexpectedly, we found significant decoding of familiarity information in early visual  
303 cortex while controlling for identity information. Additional ROI decoding analyses in  
304 early visual areas (Wang et al., 2015) revealed that familiarity information could be  
305 decoded in V2 and V3 (see Supplementary Material). Low-level image differences did  
306 not seem to explain this finding: familiar and unfamiliar faces were indistinguishable  
307 using features extracted from the HMAX model (Riesenhuber & Poggio, 1999; Serre et  
308 al., 2007). Recent studies have shown that feedback information from higher-order  
309 visual areas to early visual cortex carries fine-grained information about the category  
310 of the stimuli being observed (Morgan, Petro, & Muckli, 2016; Muckli et al., 2015),  
311 suggesting that feedback processes might have contributed to the significant  
312 familiarity decoding in early visual areas. However, future studies with paradigms  
313 designed to address the nature of these feedback processes are needed to further  
314 test this possibility.

315 In addition to identity-independent familiarity, the same network carries information  
316 about specific identities. We tested for this type of information with separate MVPC  
317 analyses of four familiar identities and four unfamiliar identities. By not including  
318 familiar and unfamiliar identities in the same analysis, we could test for identity-  
319 specific neural patterns that were not dependent on familiarity. Again, this network  
320 was more extensive than that reported in previous studies (e.g. Anzellotti, Fairhall, &  
321 Caramazza, 2013; Guntupalli et al., 2017; Kriegeskorte, Formisano, Sorger, & Goebel,  
322 2007; V. S. Natu et al., 2010; Nestor, Plaut, & Behrmann, 2011), most probably due to  
323 the larger number of subjects and, perhaps, the inclusion of personally familiar faces.  
324 Importantly, this network included the IFG, consistent with Guntupalli et al. (2017), and  
325 extended into the MTG/STS, TPJ, precuneus, and MPFC.

326 Identity decoding was also found in early visual cortex and the posterior ventral core  
327 system, likely reflecting to some extent image-specific information. In Guntupalli et al.  
328 (2017) we showed that view-dependent representation of faces was the dominant  
329 factor in early visual cortex and the OFA. We did not find a significant difference in  
330 MVPC of familiar identities as compared to MVPC of unfamiliar identities, despite the  
331 large number of subjects in this study. There was a nonsignificant trend towards  
332 higher MVPC accuracies for familiar identities in the IFG and MTG/STS, but more work

333 is needed to establish whether these trends are real.

## 334 **Conclusions**

335 Our results revealed new structure in the distributed system for face perception,  
336 suggesting that the core system can be subdivided into ventral, dorsal, and anterior  
337 components based on differences of representations. The anterior portion of the core  
338 system may be the point at which the ventral and dorsal pathways converge to  
339 generate view-independent representations of identity and of socially-relevant visual  
340 information, such as direction of attention. Identity-independent information about  
341 familiarity could be decoded in extended system areas such as the TPJ, precuneus,  
342 and MPFC, as well as in dorsal and anterior core system areas such as the MTG/STS,  
343 anterior fusiform cortex, and IFG. In sum, these results reveal new information about  
344 how face perception, one of the most highly developed and socially relevant visual  
345 functions, is realized in an extensive distributed system involving cortical fields in  
346 occipital, temporal, parietal, and prefrontal cortices.

## 347 **Materials and Methods**

### 348 **Participants**

349 Thirty-three young adults participated in the experiment (mean age 23 y.o. +/- 3.33  
350 SD, 13 males). They were recruited from the Dartmouth College community and all  
351 had normal or corrected-to-normal vision. Prior to the imaging study we took pictures  
352 of four friends for each participant to use as familiar stimuli. Some of these friends  
353 also were study participants (pictures of 76 individuals were taken as familiar stimuli).  
354 Photos of unfamiliar individuals were collected at the University of Vermont  
355 (Burlington) using the same camera and lighting conditions. Prior to participation in  
356 the fMRI study, subjects were screened for MRI compliance and provided informed  
357 consent in accordance with the Committee for the Protection of Human Subjects at  
358 Dartmouth College.

## 359 **Stimuli**

360 The stimuli for the fMRI experiment were pictures portraying different familiar and  
361 unfamiliar identities: four friends' faces, four unknown faces, and the subject's own  
362 face. For each identity we used three images with different head orientations: frontal  
363 view and 30-degree profiles to the left and right with gaze towards the camera. All  
364 photos on both sites (Dartmouth College and University of Vermont) were taken using  
365 the same consumer-grade digital camera in a dedicated photo-studio room with black  
366 background and uniform lighting.

367 Each familiar face was matched with an unfamiliar individual face, similar in age,  
368 gender and ethnicity. Twenty-seven images (9 individuals, 3 head positions) were  
369 used in the experimental design per each subject. Stimuli were presented to the  
370 subjects in the MRI scanner using a projection screen positioned at the rear of the  
371 scanner and viewed through a mirror mounted on the head coil.

372 The original high-resolution digital images were cropped to include the face from the  
373 top of the head to the neck visible under the chin, centered on the face. Images were  
374 scaled to 400x400 pixels. Images subtended approximately 10x10 degrees of visual  
375 angle.

## 376 **Procedure**

377 The stimuli were presented using a slow event-related design while subjects were  
378 engaged in a simple oddball task (Figure 1). A typical trial consisted of three different  
379 images of the same individual, each presented for 500 ms with no gap. On catch  
380 trials, one of the three images was of a different individual. The order of head  
381 orientations within trials was randomized. The task was included to make sure that  
382 subjects paid attention to the identity of the faces. Before entering the scanner,  
383 subjects had a short practice session with each condition (one trial for each of 9  
384 identities, one blank trial, and one catch trial) to be familiarized with the design and the  
385 stimuli.

386 The order of the events was pseudo-randomized to approximate a first-order  
387 counterbalancing of conditions (Aguirre, 2007). A functional run comprised 48 trials:

388 four trials for each of the nine individuals (four familiar, four unfamiliar and self), four  
389 blank trials, four oddball and four buffer trials (three at the beginning and one at the  
390 end). The buffer trials were added to optimize the trial order and were discarded from  
391 the analysis. Each run had 10 seconds of fixation at the beginning (to stabilize the  
392 hemodynamic response) and at the end (to collect the response to the last trials).  
393 Each session consisted of 11 functional runs, resulting in 396 non-oddball trials (44 for  
394 each of the nine identities).

## 395 **Image acquisition**

396 Brain images were acquired using a 3T Philips Achieva Intera scanner with a 32-  
397 channel head coil. Functional imaging used gradient-echo echo-planar-imaging with  
398 SENSE reduction factor of 2. The MR parameters were TE/TR = 35/2000 ms, Flip  
399 angle = 90°, in-plane resolution = 3×3 mm, matrix size of 80×80 and FOV = 240×240  
400 mm. 35 axial slices were acquired with no gap covering the entire brain except the  
401 most dorsal portion (Supplementary Figure 9). Slices were acquired in the Philips-  
402 specific interleaved order (slice step of 6, i.e., ceiled square root of total number of  
403 slices). Each of the 11 functional runs included 154 dynamic scans with 4 dummy  
404 scans for a total time of 316 seconds per run. After the functional runs a single high-  
405 resolution T1-weighted (TE/TR = 3.7/8.2 ms) anatomical scan was acquired with a 3D-  
406 TFE sequence. The voxel resolution was 0.938×0.938×1.0 mm with a bounding box  
407 matrix of 256×256×160 (FOV = 240×240×160 mm).

## 408 **Image preprocessing**

409 All preprocessing steps were run using a Nipype workflow (version 0.11.0; FSL version  
410 5.0.9) (K. Gorgolewski, Burns, Madison, & Clark, 2011; Jenkinson, Beckmann, Beh-  
411 rens, Woolrich, & Smith, 2012), which also used functions from SciPy (Jones, Oli-  
412 phant, & Peterson, 2001) and NumPy (van der Walt, Colbert, & Varoquaux, 2011). We  
413 modified the preprocessing pipeline *fmri\_ants\_openfmri.py* and adapted it for our  
414 analyses. The modified version is available at [https://www.github.com/](https://www.github.com/mvdoc/famface)  
415 [mvdoc/famface](https://www.github.com/mvdoc/famface). All the preprocessing analyses were run on a computing cluster  
416 running Debian Jessie with tools provided by the NeuroDebian repository (Halchenko

417 & Hanke, 2012).

## 418 **Preprocessing Steps**

419 We used a standard FSL preprocessing pipeline (FEAT) as implemented in Nipype  
420 (*nipype.preprocess.create\_featreg\_preproc*), using a FWHM smoothing of 6 mm, a  
421 highpass filter at 60 s cutoff, and the first volume of the first run as a reference for EPI  
422 alignment. After motion correction, the BOLD time-series were masked with a dilated  
423 gray-matter mask, smoothed, and then high-pass filtered. The preprocessed data  
424 were then used for a GLM and MVPA analysis, with additional preprocessing steps as  
425 described in the following sections.

## 426 **Template Registration**

427 Each subject's data (functional or second-level betas) were resliced into the MNI  
428 template with 2 mm isotropic voxel size. First, a reference volume was created by  
429 computing a median temporal SNR volume across functional runs. Then, we computed  
430 an affine transformation registering this median tSNR volume to the subject's  
431 anatomical scan using FSL's FLIRT tool (Jenkinson, Bannister, Brady, & Smith, 2002),  
432 and the transformation was improved using the BBR cost function. A second non-  
433 linear transformation registering the subject's anatomical image to the MNI template  
434 was computed using ANTs (Avants, Tustison, & Song, 2009) with default parameters.  
435 The affine and nonlinear transformations were then combined to reslice the reference  
436 volume and all the functional volumes and second-level betas into the MNI template.  
437 Results from this registration pipeline were visually inspected for each subject.

## 438 **MVPA Preprocessing**

439 First, we resliced the bold time-series into the MNI template using a combination of  
440 linear and nonlinear transformations (see Template Registration section). Then, we  
441 extracted beta parameters associated with each condition for each run using  
442 PyMVPA's *fit\_event\_hrf\_model* (Hanke et al., 2009) function based on NiPy's  
443 functionality (Millman & Brett, 2007). Additional nuisance regressors comprised motion  
444 estimates, artifacts (volumes were marked as artifact if their intensity exceeded three  
445 standard deviations of the normalized intensity), and noise estimates. To obtain noise



446 estimates we used the CompCor method (Behzadi, Restom, Liau, & Liu, 2007). In  
447 brief, we performed a GLM on the BOLD timeseries in the voxels belonging to each  
448 subject's white-matter mask projected in MNI space. The regressors of this GLM were  
449 the motion estimates and volumes marked as artifacts. We then performed PCA on  
450 the residuals, and took the first 5 components as noise estimates.

## 451 **GLM analyses**

452 The first-level and second-level analyses (fixed effect) for each subject were  
453 performed in the subject's individual space, and the results were then projected into a  
454 standard template (FSL's MNI152, 2 mm isotropic, see details in the Template  
455 Registration section). These analyses followed a standard FSL pipeline as  
456 implemented in Nipype (*nipype.estimate.create\_modelfit\_workflow* and  
457 *nipype.estimate.create\_fixed\_effects\_flow*). A standard GLM analysis was performed  
458 separately for each run to extract beta values associated with each condition and the  
459 planned contrasts. Additional nuisance regressors comprised motion estimates,  
460 artifacts (volumes were marked as artifact if their intensity exceeded three standard  
461 deviations of the normalized intensity), and first-order derivatives. A second-level  
462 analysis was performed to obtain per-subject statistical maps associated with each  
463 condition and contrast using FSL's *FLAMEO* (fixed-effect model). The statistical maps  
464 were then resliced into the MNI152 template (see details above), and a third-level  
465 analysis was performed across subjects using FSL's *FLAMEO* (mixed-effect model).  
466 The resulting z-stat maps were then corrected for multiple comparisons using FSL's  
467 *cluster* routine, with a voxel z-threshold set at 2.3, and cluster p-value of  $p = .05$ . The  
468 Nipype pipeline we used for third-level analysis can be found at  
469 <https://www.github.com/mvdoc/famface><sup>1</sup>.

## 470 **MVPA analyses**

### 471 **Classification methods**

472 MVPC was implemented in Python using PyMVPA (Hanke et al., 2009)

---

<sup>1</sup> We thank Satrajit Ghosh and Anne Park for sharing the original pipeline.

473 [http://www.py\\_mvpa.org](http://www.py_mvpa.org)). GLM betas were estimated within each run for each  
474 condition (see MVPA Preprocessing section). For all analyses we kept only the betas  
475 for the four familiar and the four unfamiliar identities, discarding trials where subjects  
476 saw their own face, or responded to an oddball presentation. The betas were then z-  
477 scored within each run (separately for each voxel) and used as features for  
478 classification. We used Linear C-SVM as a classifier, as implemented in LIBSVM  
479 (Chang & Lin, 2011). The C parameter was set to the PyMVPA default, which scales it  
480 according to the mean norm of the training data.

## 481 **Cross-validation**

482 We used a leave-one-out (LOO) scheme for cross-validation. The splitting unit was  
483 dependent on the type of classification (familiarity or identity). For familiarity  
484 classification, we cross-validated across pairs of identities. We trained the classifier  
485 on three familiar and three unfamiliar identities, and tested on the left-out identities.  
486 This resulted in 16 cross-validation splits that allowed us to control for identity  
487 information (see Supplementary Figures 1 and 2 for a comparison of leave-one-run-  
488 out and leave-two-identities-out cross-validation schemes). For identity classification,  
489 we cross-validated across runs, resulting in a leave-one-run-out scheme (11 splits). To  
490 remove the effect of familiarity on classification of face identity, we performed identity  
491 classification independently for familiar and unfamiliar identities, and averaged the  
492 resulting accuracy maps.

## 493 **Searchlight**

494 We used sphere searchlights (Kriegeskorte, Goebel, & Bandettini, 2006) to extract  
495 local features for classification. We selected a 5-voxel radius (10 mm), and moved the  
496 searchlight sphere across the voxels belonging to a union mask in which at least 26  
497 subjects (~80%, arbitrarily chosen) had fMRI coverage (see Supplementary Figure 9),  
498 as well as selecting only gray- and white-matter voxels in the cerebrum. For each  
499 center voxel in this mask, we selected nearby voxels contained in a sphere, and used  
500 them as features for classification. The classifier's accuracy was stored in the central  
501 voxel, and the process was repeated for every voxel.

## 502 **Statistical assessment**

503 To determine statistical significance for the MVPC analyses, we performed  
504 permutation testing (Stelzer, Chen, & Turner, 2013) coupled with Threshold-Free  
505 Cluster Enhancement (TFCE, (Smith & Nichols, 2009), as implemented in  
506 CoSMoMVPA (Oosterhof, Connolly, & Haxby, 2016). For each subject and each  
507 classification analysis, we computed a null distribution by randomly permuting the  
508 labels and performing classification. For identity classification analysis, we randomly  
509 shuffled the identity labels within each run, and performed classification. This  
510 procedure was repeated 20 times for each subject. For familiarity analysis, we  
511 randomly permuted the familiarity labels across the entire experiment. This was  
512 repeated exhaustively, resulting in 35 permutations (see Supplementary Materials for a  
513 short proof that only 35 unique permutations are possible in this case). To create a  
514 null distribution of TFCE values for each voxel, permutation maps were randomly  
515 sampled and averaged across subjects, and this process was repeated 10,000 times.  
516 Note that we selected a smaller number of permutations than suggested by (Stelzer et  
517 al., 2013) (100 per subject) because of the large number of subjects we had: with 33  
518 subjects, the number of possible average maps for identity classification was  $20^{33}$  and  
519 for familiarity classification was  $35^{33}$ .

## 520 **Similarity of neural representations within ROIs**

### 521 **Second-order Representational Similarity Analysis**

522 We defined ROIs based on the searchlight results for both the familiarity and identity  
523 classification. Thirty spherical ROIs were centered on voxels selected manually at or  
524 near peak values, with a 10 mm radius (five voxels). Voxels belonging to more than  
525 one ROI were assigned to the ROI with the closest center (Euclidean distance),  
526 resulting in some contiguous but not overlapping ROIs (see Figure 5). On average,  
527 ROIs contained 412 voxels at a 2 mm isotropic resolution (SD: 73 voxels).

528 For each ROI we computed a cross-validated representational dissimilarity matrix  
529 (RDM) (Henriksson, Khaligh-Razavi, Kay, & Kriegeskorte, 2015) between the eight  
530 identities (four familiar faces, four unfamiliar faces). First, we z-scored the beta  
531 estimates within each run, which were computed as described in the MVPA

532 Preprocessing section. Then, we divided all runs into two partitions of six and five  
533 runs, and averaged the beta values within each partition. The data between these two  
534 partitions were correlated (Pearson correlation) to obtain an 8x8 matrix of  
535 dissimilarities between pairs of identities. Note that because correlations were  
536 computed between data from two different partitions, the diagonal could be different  
537 from one. This process was repeated for every possible combination of runs, yielding  
538 462 RDMs that were averaged to obtain a final RDM for each ROI and each subject.  
539 The final RDMs were made symmetrical by averaging them with their transpose. All  
540 averaging operations were performed on Fisher-transformed (r-to-z) correlation  
541 values, then mapped back to correlation using the inverse transformation.

542 We used these final RDMs to compute pairwise distances between ROIs for each  
543 subject individually using correlation distance. The resulting 33 distance matrices (one  
544 for each subject) were averaged to obtain a group-level distance matrix. This distance  
545 matrix was used to compute a three-dimensional MDS solution, using classical MDS  
546 as implemented in R (*cmdscale*) interfaced in Python using *rpy2* (Gautier, 2008).

#### 547 **Comparison with movie data**

548 To investigate the reproducibility of the network formed by the ROIs defined above,  
549 we computed between-subject correlation distances across these ROIs using  
550 hyperaligned data from a different study, in which eleven participants watched  
551 “Raiders of the Lost Ark” (Guntupalli et al., 2016; Haxby et al., 2011). Since data were  
552 functionally aligned with hyperalignment (Guntupalli et al., 2016; Haxby et al., 2011),  
553 we performed a between-subject analysis instead of a within-subject analysis, where  
554 distances between pairwise ROIs were computed across subjects, replicating the  
555 approach in (Guntupalli et al., 2016). Additional details on the experimental paradigm  
556 and scanning parameters can be found in the Supplementary Material.

557 Because data were in two different resolutions of the same template (task: MNI 2 mm;  
558 movie: MNI 3 mm), center coordinates of the spherical ROIs were recalculated  
559 assigning the closest voxel in MNI 3 mm using Euclidean distance. The median  
560 displacement was 1.41 mm (min: 1 mm, max: 1.73 mm). As described above,  
561 spherical ROIs were drawn around these center voxels using a radius of 9 mm (3

562 voxels) to account for the different voxel size. Overlapping voxels were assigned to  
563 the ROI with the closest center, resulting in possibly contiguous but not overlapping  
564 ROIs. On average ROIs contained 100 voxels (SD: 20 voxels).

565 The movie data were masked selecting only white- and gray-matter voxels, and  
566 divided into two parts for cross-validation. For each of the two parts, whole-brain  
567 searchlight hyperalignment parameters were derived from one part of the movie, and  
568 the second part was projected into the common model space in functional alignment  
569 (Guntupalli et al., 2016; Haxby et al., 2011). The aligned data were z-scored, and  
570 timepoint-by-timepoint RDMs were computed in each ROI for each subject  
571 individually, yielding a 1322 x 1322 RDM within each ROI (1336 x 1336 for the second  
572 fold of hyperalignment). Following the analysis in (Guntupalli et al., 2016) we estimated  
573 a distance matrix between ROIs while cross-validating across subjects. For each pair  
574 of ROIs, the correlation between their RDMs was computed for all 55 pairs of  
575 subjects, and averaged to compute the cross-validated correlation between those  
576 ROIs. This process resulted in two 30x30 cross-validated distance matrices (one for  
577 each hyperalignment fold), which were made symmetrical by averaging them with their  
578 transpose, and finally averaged together to obtain one final 30x30 matrix. All  
579 averaging operations were computed on Fisher-transformed (r-to-z) correlation values,  
580 then mapped back to correlation using the inverse transformation. Finally, a  
581 dissimilarity index (D) was computed for each pair of ROIs to normalize the correlation  
582 according to the maximum possible correlation within each ROI (Guntupalli et al.,  
583 2016):

584 
$$D_{ROI1 \cdot ROI2} = 1 - \frac{r_{ROI1 \cdot ROI2}}{\sqrt{r_{ROI1} \cdot r_{ROI2}}}$$

585 The final matrix containing dissimilarity indices was then used to compute an MDS  
586 solution as described previously.

### 587 **Differences between core and extended system representational geometries**

588 In order to quantify differences in representational geometries between areas of the  
589 core and extended systems, we divided the pairwise distances between ROIs in the  
590 upper triangular RDM into within-system and between-system cells, and converted

591 them back to correlations (by subtracting them from 1). Then, we ran a Linear Mixed-  
592 Effect Model on the correlations using *lme4* (Bates, Maechler, Bolker, & Walker, 2014),  
593 fitting a linear model of the form

$$594 \quad r_{i,j} = \beta_0 + \beta_1 C_{i,j} + \beta_2 E_{i,j} + z_i,$$

595 where  $i = 1 \dots N$  indicates either the subjects for task data ( $N = 33$ ) or the pairwise  
596 subjects for hyperaligned movie data ( $N = 55$ );  $j = 1 \dots 465$  indicates the index of the  
597 pairwise correlations between ROIs,  $C_{i,j}$  and  $E_{i,j}$  indicate whether  $r_{i,j}$  is a within-  
598 system correlation for the core or extended system respectively,  $\beta_0, \beta_1, \beta_2$  are fixed-  
599 effects parameters, and  $z_i$  are the subject-level random effects. Using this model,  
600  $\beta_1$  corresponds to the contrast “Within Core > Between”, and  $\beta_2$  to the contrast “Within  
601 Extended > Between”. After fitting, we performed parametric bootstrapping to obtain  
602 95% bootstrapped confidence intervals on the model parameters.

## 603 **Visualization**

604 Volumetric results were visualized using Nilearn (Abraham et al., 2014), and projected  
605 on template surfaces using AFNI and SUMA (Cox, 1996; Saad, Reynolds, Argall,  
606 Japee, & Cox, 2004).

## 607 **Data and code availability**

608 Non-thresholded statistical maps can be found on [neurovault.org](http://neurovault.org) (K. J. Gorgolewski  
609 et al., 2015) at the following URL: <http://neurovault.org/collections/NEUNABL.T>. All  
610 data can be found at <http://datasets.datalad.org/?dir=/labs/gobbini/famface/data><sup>2</sup>.  
611 The code used for the analyses is available at the following GitHub repository:  
612 <https://www.github.com/mvdoc/famface>.

## 613 **Acknowledgments**

614 The authors would like to thank Jim Haxby, Brad Duchaine, and the members of the  
615 GobbiniLab and HaxbyLab for helpful comments and discussions on this work.

---

<sup>2</sup> All data will be released after publication. Currently, data from the first subject are available from the DataLad repository.

## 616 **References**

- 617 Abraham, A., Pedregosa, F., Eickenberg, M., Gervais, P., Mueller, A., Kossaifi, J., ...  
618 Varoquaux, G. (2014). Machine learning for neuroimaging with scikit-learn.  
619 *Frontiers in Neuroinformatics*, 8, 14.
- 620 Aguirre, G. K. (2007). Continuous carry-over designs for fMRI. *NeuroImage*, 35(4),  
621 1480–1494.
- 622 Anzellotti, S., Fairhall, S. L., & Caramazza, A. (2013). Decoding Representations of  
623 Face Identity That are Tolerant to Rotation. *Cerebral Cortex* . Retrieved from  
624 <http://www.cercor.oxfordjournals.org/cgi/doi/10.1093/cercor/bht046>
- 625 Avants, B. B., Tustison, N., & Song, G. (2009). Advanced normalization tools (ANTs).  
626 *The Insight Journal*, 2, 1–35.
- 627 Bates, D., Maechler, M., Bolker, B., & Walker, S. (2014). Package “lme4.” *R*  
628 *Foundation for ...*. Retrieved from [http://cran.r-](http://cran.r-mirror.de/web/packages/lme4/lme4.pdf)  
629 [mirror.de/web/packages/lme4/lme4.pdf](http://cran.r-mirror.de/web/packages/lme4/lme4.pdf)
- 630 Behzadi, Y., Restom, K., Liau, J., & Liu, T. T. (2007). A component based noise  
631 correction method (CompCor) for BOLD and perfusion based fMRI. *NeuroImage*,  
632 37(1), 90–101.
- 633 Bobes, M. A., Lage Castellanos, A., Quiñones, I., García, L., & Valdes-Sosa, M. (2013).  
634 Timing and tuning for familiarity of cortical responses to faces. *PloS One*, 8(10),  
635 e76100.
- 636 Bruce, V., Henderson, Z., Newman, C., & Burton, A. M. (2001). Matching identities of  
637 familiar and unfamiliar faces caught on CCTV images. *Journal of Experimental*  
638 *Psychology. Applied*, 7(3), 207.
- 639 Burton, A. M., Jenkins, R., & Schweinberger, S. R. (2011). Mental representations of  
640 familiar faces. *British Journal of Psychology* , 102(4), 943–958.
- 641 Burton, A. M., Wilson, S., Cowan, M., & Bruce, V. (1999). Face Recognition in Poor-  
642 Quality Video: Evidence From Security Surveillance. *Psychological Science*, 10(3),  
643 243–248.
- 644 Carlin, J. D., Calder, A. J., Kriegeskorte, N., Nili, H., & Rowe, J. B. (2011). A head view-  
645 invariant representation of gaze direction in anterior superior temporal sulcus.

- 646 *Current Biology: CB*, 21(21), 1817–1821.
- 647 Carlin, J. D., Rowe, J. B., Kriegeskorte, N., Thompson, R., & Calder, A. J. (2012).  
648 Direction-sensitive codes for observed head turns in human superior temporal  
649 sulcus. *Cerebral Cortex*, 22(4), 735–744.
- 650 Chang, C.-C., & Lin, C.-J. (2011). LIBSVM: A library for support vector machines. *ACM*  
651 *Transactions on Intelligent Systems and Technology*, 2(3), 1–27.
- 652 Chauhan, V., Visconti di Oleggio Castello, M., Soltani, A., & Gobbini, M. I. (2017).  
653 Social Saliency of the Cue Slows Attention Shifts. *Frontiers in Psychology*, 8, 738.
- 654 Cloutier, J., Kelley, W. M., & Heatherton, T. F. (2011). The influence of perceptual and  
655 knowledge-based familiarity on the neural substrates of face perception. *Social*  
656 *Neuroscience*, 6(1), 63–75.
- 657 Collins, J. A., & Olson, I. R. (2014). Beyond the FFA\_ The role of the ventral anterior  
658 temporal lobes in face processing. *Neuropsychologia*, 61(C), 65–79.
- 659 Connolly, A. C., Sha, L., Guntupalli, J. S., Oosterhof, N., Halchenko, Y. O., Nastase, S.  
660 A., ... Others. (2016). How the Human Brain Represents Perceived  
661 Dangerousness or “Predacity” of Animals. *The Journal of Neuroscience: The*  
662 *Official Journal of the Society for Neuroscience*, 36(19), 5373–5384.
- 663 Corbetta, M., & Shulman, G. L. (2002). Control of goal-directed and stimulus-driven  
664 attention in the brain. *Nature Reviews. Neuroscience*, 3(3), 201–215.
- 665 Cox, R. W. (1996). AFNI: software for analysis and visualization of functional magnetic  
666 resonance neuroimages. *Computers and Biomedical Research, an International*  
667 *Journal*, 29(3), 162–173.
- 668 Diamond, R., & Carey, S. (1986). Why faces are and are not special: An effect of  
669 expertise. *Journal of Experimental Psychology. General*, 115(2), 107.
- 670 Duchaine, B., & Yovel, G. (2015). A Revised Neural Framework for Face Processing.  
671 *Annual Review of Vision Science*, 1(1), 393–416.
- 672 Fairhall, S. L., & Ishai, A. (2007). Effective Connectivity within the Distributed Cortical  
673 Network for Face Perception. *Cerebral Cortex*, 17(10), 2400–2406.
- 674 Gautier, L. (2008). rpy2: A Simple and Efficient Access to R from Python. *URL*  
675 *Http://rpy.sourceforge.net/rpy2.Html*.
- 676 Gobbini, M. I. (2010). Distributed process for retrieval of person knowledge. *Social*



- 677           *Neuroscience: Toward Understanding the Underpinnings of the Social Mind*, 40–  
678           53.
- 679   Gobbini, M. I., Gors, J. D., Halchenko, Y. O., Rogers, C., Guntupalli, J. S., Hughes, H.,  
680           & Cipolli, C. (2013). Prioritized Detection of Personally Familiar Faces. *PloS One*,  
681           8(6), e66620.
- 682   Gobbini, M. I., & Haxby, J. V. (2006). Neural response to the visual familiarity of faces.  
683           *Brain Research Bulletin*, 71(1-3), 76–82.
- 684   Gobbini, M. I., & Haxby, J. V. (2007). Neural systems for recognition of familiar faces.  
685           *Neuropsychologia*, 45(1), 32–41.
- 686   Gobbini, M., Leibenluft, E., Santiago, N., & Haxby, J. V. (2004). Social and emotional  
687           attachment in the neural representation of faces. *NeuroImage*, 22(4), 1628–1635.
- 688   Gorgolewski, K., Burns, C. D., Madison, C., & Clark, D. (2011). Nipype: a flexible,  
689           lightweight and extensible neuroimaging data processing framework in python.  
690           *Front ...*. Retrieved from  
691           [http://www.research.ed.ac.uk/portal/files/18241445/fninf\\_05\\_00013.pdf](http://www.research.ed.ac.uk/portal/files/18241445/fninf_05_00013.pdf)
- 692   Gorgolewski, K. J., Varoquaux, G., Rivera, G., Schwarz, Y., Ghosh, S. S., Maumet, C.,  
693           ... Margulies, D. S. (2015). NeuroVault.org: a web-based repository for collecting  
694           and sharing unthresholded statistical maps of the human brain. *Frontiers in*  
695           *Neuroinformatics*, 9, 8.
- 696   Grill-Spector, K., & Weiner, K. S. (2014). The functional architecture of the ventral  
697           temporal cortex and its role in categorization. *Nature Reviews. Neuroscience*,  
698           15(8), 536–548.
- 699   Guntupalli, J. S., Hanke, M., Halchenko, Y. O., Connolly, A. C., Ramadge, P. J., &  
700           Haxby, J. V. (2016). A Model of Representational Spaces in Human Cortex.  
701           *Cerebral Cortex* , bhw068.
- 702   Guntupalli, J. S., Wheeler, K. G., & Gobbini, M. I. (2017). Disentangling the  
703           Representation of Identity from Head View Along the Human Face Processing  
704           Pathway. *Cerebral Cortex* . <https://doi.org/10.1093/cercor/bhw344>
- 705   Halchenko, Y. O., & Hanke, M. (2012). Open is Not Enough. Let's Take the Next Step:  
706           An Integrated, Community-Driven Computing Platform for Neuroscience.  
707           *Frontiers in Neuroinformatics*, 6, 22.

- 708 Hancock, P., Bruce, V., & Burton, A. M. (2000). Recognition of unfamiliar faces. *Trends*  
709 *in Cognitive Sciences*. Retrieved from  
710 <http://www.sciencedirect.com/science/article/pii/S1364661300015199>
- 711 Hanke, M., Halchenko, Y. O., Sederberg, P. B., Hanson, S. J., Haxby, J. V., &  
712 Pollmann, S. (2009). PyMVPA: a Python Toolbox for Multivariate Pattern Analysis  
713 of fMRI Data. *Neuroinformatics*, 7(1), 37–53.
- 714 Haxby, J. V., Connolly, A. C., & Guntupalli, J. S. (2014). Decoding Neural  
715 Representational Spaces Using Multivariate Pattern Analysis. *Annual Review of*  
716 *Neuroscience*, 37(1), 435–456.
- 717 Haxby, J. V., & Gobbini, M. I. (2011). Distributed neural systems for face perception. In  
718 A. Calder, G. Rhodes, M. Johnson, & J. Haxby (Eds.), *Oxford Handbook of Face*  
719 *Perception*. OUP Oxford.
- 720 Haxby, J. V., Gobbini, M. I., Furey, M. L., Ishai, A., Schouten, J. L., & Pietrini, P. (2001).  
721 Distributed and overlapping representations of faces and objects in ventral  
722 temporal cortex. *Science*, 293(5539), 2425–2430.
- 723 Haxby, J. V., Guntupalli, J. S., Connolly, A. C., Halchenko, Y. O., Conroy, B. R.,  
724 Gobbini, M. I., ... Ramadge, P. J. (2011). A Common, High-Dimensional Model of  
725 the Representational Space in Human Ventral Temporal Cortex. *Neuron*, 72(2),  
726 404–416.
- 727 Haxby, J. V., Hoffman, E. A., & Gobbini, M. I. (2000). The distributed human neural  
728 system for face perception. *Trends in Cognitive Sciences*, 4(6), 223–233.
- 729 Haxby, J. V., Horwitz, B., Ungerleider, L. G., Maisog, J. M., Pietrini, P., & Grady, C. L.  
730 (1994). The functional organization of human extrastriate cortex: a PET-rCBF  
731 study of selective attention to faces and locations. *The Journal of Neuroscience:*  
732 *The Official Journal of the Society for Neuroscience*, 14(11 Pt 1), 6336–6353.
- 733 Henriksson, L., Khaligh-Razavi, S.-M., Kay, K., & Kriegeskorte, N. (2015). Visual  
734 representations are dominated by intrinsic fluctuations correlated between areas.  
735 *NeuroImage*, 1–48.
- 736 Huth, A. G., de Heer, W. A., Griffiths, T. L., Theunissen, F. E., & Gallant, J. L. (2016).  
737 Natural speech reveals the semantic maps that tile human cerebral cortex.  
738 *Nature*, 532(7600), 453–458.

- 739 Jenkinson, M., Bannister, P., Brady, M., & Smith, S. (2002). Improved optimization for  
740 the robust and accurate linear registration and motion correction of brain images.  
741 *NeuroImage*, *17*(2), 825–841.
- 742 Jenkinson, M., Beckmann, C. F., Behrens, T. E. J., Woolrich, M. W., & Smith, S. M.  
743 (2012). FSL. *NeuroImage*, *62*(2), 782–790.
- 744 Jenkins, R., & Burton, A. M. (2011). Stable face representations. *Philosophical*  
745 *Transactions of the Royal Society of London. Series B, Biological Sciences*,  
746 *366*(1571), 1671–1683.
- 747 Jones, E., Oliphant, T., & Peterson, P. (2001). SciPy: Open source scientific tools for  
748 Python. Retrieved from <http://www.scipy.org/>
- 749 Kriegeskorte, N., Formisano, E., Sorger, B., & Goebel, R. (2007). Individual faces elicit  
750 distinct response patterns in human anterior temporal cortex. *Proceedings of the*  
751 *National Academy of Sciences of the United States of America*, *104*(51), 20600–  
752 20605.
- 753 Kriegeskorte, N., Goebel, R., & Bandettini, P. (2006). Information-based functional  
754 brain mapping. *Proceedings of the National Academy of Sciences*, *103*(10), 3863–  
755 3868.
- 756 Kriegeskorte, N., & Kievit, R. A. (2013). Representational geometry: integrating  
757 cognition, computation, and the brain. *Trends in Cognitive Sciences*, *17*(8), 401–  
758 412.
- 759 Kriegeskorte, N., Mur, M., & Bandettini, P. (2008). Representational similarity analysis -  
760 connecting the branches of systems neuroscience. *Frontiers in Systems*  
761 *Neuroscience*, *2*, 4.
- 762 Millman, K. J., & Brett, M. (2007). Analysis of Functional Magnetic Resonance Imaging  
763 in Python. *Computing in Science Engineering*, *9*(3), 52–55.
- 764 Morgan, A. T., Petro, L. S., & Muckli, L. (2016, January 1). *Cortical feedback to V1 and*  
765 *V2 contains unique information about high-level scene structure*. *bioRxiv*.  
766 <https://doi.org/10.1101/041186>
- 767 Muckli, L., De Martino, F., Vizioli, L., Petro, L. S., Smith, F. W., Ugurbil, K., ... Yacoub,  
768 E. (2015). Contextual Feedback to Superficial Layers of V1. *Current Biology: CB*,  
769 *25*(20), 2690–2695.

- 770 Natu, V., & O'Toole, A. J. (2011). The neural processing of familiar and unfamiliar  
771 faces: A review and synopsis. *British Journal of Psychology*, *102*(4), 726–747.
- 772 Natu, V. S., Jiang, F., Narvekar, A., Keshvari, S., Blanz, V., & O'Toole, A. J. (2010).  
773 Dissociable neural patterns of facial identity across changes in viewpoint. *Journal*  
774 *of Cognitive Neuroscience*, *22*(7), 1570–1582.
- 775 Nestor, A., Plaut, D. C., & Behrmann, M. (2011). Unraveling the distributed neural code  
776 of facial identity through spatiotemporal pattern analysis. *Proceedings of the*  
777 *National Academy of Sciences of the United States of America*, *108*(24), 9998–  
778 10003.
- 779 Oosterhof, N. N., Connolly, A. C., & Haxby, J. V. (2016). CoSMoMVPA: Multi-Modal  
780 Multivariate Pattern Analysis of Neuroimaging Data in Matlab/GNU Octave.  
781 *Frontiers in Neuroinformatics*, *10*, 27.
- 782 O'Toole, A. J., Roark, D. A., & Abdi, H. (2002). Recognizing moving faces: a  
783 psychological and neural synthesis. *Trends in Cognitive Sciences*, *6*(6), 261–266.
- 784 Pitcher, D., Dilks, D. D., Saxe, R. R., Triantafyllou, C., & Kanwisher, N. (2011).  
785 Differential selectivity for dynamic versus static information in face-selective  
786 cortical regions. *NeuroImage*, *56*(4), 2356–2363.
- 787 Rajimehr, R., Young, J. C., & Tootell, R. B. H. (2009). An anterior temporal face patch  
788 in human cortex, predicted by macaque maps. *Proceedings of the National*  
789 *Academy of Sciences of the United States of America*, *106*(6), 1995–2000.
- 790 Ramon, M., Vizioli, L., Liu-Shuang, J., & Rossion, B. (2015). Neural microgenesis of  
791 personally familiar face recognition. *Proceedings of the National Academy of*  
792 *Sciences of the United States of America*, *112*(35), E4835–E4844.
- 793 Riesenhuber, M., & Poggio, T. (1999). Hierarchical models of object recognition in  
794 cortex. *Nature Neuroscience*, *2*(11), 1019–1025.
- 795 Saad, Z. S., Reynolds, R. C., Argall, B., Japee, S., & Cox, R. W. (2004). SUMA: an  
796 interface for surface-based intra- and inter-subject analysis with AFNI. In *2004*  
797 *2nd IEEE International Symposium on Biomedical Imaging: Nano to Macro (IEEE*  
798 *Cat No. 04EX821)* (pp. 1510–1513 Vol. 2).
- 799 Serre, T., Wolf, L., Bileschi, S., Riesenhuber, M., & Poggio, T. (2007). Robust object  
800 recognition with cortex-like mechanisms. *IEEE Transactions on Pattern Analysis*

- 801 *and Machine Intelligence*, 29(3), 411–426.
- 802 Simony, E., Honey, C. J., Chen, J., Lositsky, O., Yeshurun, Y., Wiesel, A., & Hasson,  
803 U. (2016). Dynamic reconfiguration of the default mode network during narrative  
804 comprehension. *Nature Communications*, 7, 12141.
- 805 Singh-Curry, V., & Husain, M. (2009). The functional role of the inferior parietal lobe in  
806 the dorsal and ventral stream dichotomy. *Neuropsychologia*, 47(6), 1434–1448.
- 807 Smith, S. M., & Nichols, T. E. (2009). Threshold-free cluster enhancement: addressing  
808 problems of smoothing, threshold dependence and localisation in cluster  
809 inference. *NeuroImage*, 44(1), 83–98.
- 810 Stelzer, J., Chen, Y., & Turner, R. (2013). Statistical inference and multiple testing  
811 correction in classification-based multi-voxel pattern analysis (MVPA): Random  
812 permutations and cluster size control. *NeuroImage*, 65(C), 69–82.
- 813 Taylor, M. J., Arsalidou, M., Bayless, S. J., Morris, D., Evans, J. W., & Barbeau, E. J.  
814 (2009). Neural correlates of personally familiar faces: parents, partner and own  
815 faces. *Human Brain Mapping*, 30(7), 2008–2020.
- 816 Todorov, A., Gobbini, M. I., Evans, K. K., & Haxby, J. V. (2007). Spontaneous retrieval  
817 of affective person knowledge in face perception. *Neuropsychologia*, 45(1), 163–  
818 173.
- 819 van der Walt, S., Colbert, S. C., & Varoquaux, G. (2011). The NumPy Array: A  
820 Structure for Efficient Numerical Computation. *Computing in Science &  
821 Engineering*, 13(2), 22–30.
- 822 Visconti di Oleggio Castello, Wheeler, K. G., Cipolli, C., & Gobbini, M. I. (2016).  
823 Familiarity Facilitates Feature-based Face Processing.  
824 <https://doi.org/10.1101/058537>
- 825 Visconti di Oleggio Castello, M., & Gobbini, M. I. (2015). Familiar Face Detection in  
826 180ms. *PLoS One*, 10(8), e0136548.
- 827 Visconti di Oleggio Castello, M., Guntupalli, J. S., Yang, H., & Gobbini, M. I. (2014).  
828 Facilitated detection of social cues conveyed by familiar faces, 1–11.
- 829 Wang, L., Mruczek, R. E. B., Arcaro, M. J., & Kastner, S. (2015). Probabilistic Maps of  
830 Visual Topography in Human Cortex. *Cerebral Cortex*, 25(10), 3911–3931.
- 831 Weiner, K. S., Golarai, G., Caspers, J., Chuapoco, M. R., Mohlberg, H., Zilles, K., ...

832 Grill-Spector, K. (2013). The mid-fusiform sulcus: A landmark identifying both  
833 cytoarchitectonic and functional divisions of human ventral temporal cortex.  
834 *NeuroImage*, 1–13.
